# Supplementary material for: C–H reductive elimination during the reaction of cycloplatinated(ii) complexes with pyridine-2-thione: kinetic follow up
Source: Royal Society of Chemistry journal article supplement (doi:10.1039/c5ra01341k), 2015-01-01
Supplement: c5ra01341k1.pdf [file c5ra01341k1.pdf]

## Supporting information

### C-H reductive elimination during the reaction of cycloplatinated(II) complexes with pyridine-2-thione: kinetic follow up

Marzieh Dadkhah Aseman,<sup>a</sup> S. Masoud Nabavizadeh,<sup>\*a</sup> Hamid R. Shahsavari<sup>b</sup> and Mehdi Rashidi<sup>\*a</sup>

<sup>a</sup>Department of Chemistry, College of Sciences, Shiraz University, Shiraz 71467-13565 Iran, <sup>b</sup>Department of Chemistry, Institute for Advanced Studies in Basic Sciences, 45195-1159, Gava Zang, Zanjan, Iran

The Cartesian coordinates (in Angstroms) for all species discussed in the manuscript.

#### **1a**

|    |             |             |             |
|----|-------------|-------------|-------------|
| Pt | -0.55380900 | -0.43175700 | 0.00000000  |
| S  | -2.79036200 | 0.67819600  | -0.00004200 |
| N  | 0.56876200  | 1.45504500  | -0.00002300 |
| C  | -3.75628200 | 0.02293600  | 1.40571600  |
| H  | -4.77500100 | 0.41618400  | 1.35962700  |
| H  | -3.26834200 | 0.37362600  | 2.31748700  |
| H  | -3.76693900 | -1.06869900 | 1.39176100  |
| C  | -3.75636500 | 0.02283300  | -1.40569700 |
| H  | -3.76700400 | -1.06880000 | -1.39167700 |
| H  | -3.26849600 | 0.37348100  | -2.31752300 |
| H  | -4.77508600 | 0.41606900  | -1.35955800 |
| C  | 1.33305700  | -1.13524200 | 0.00002300  |
| C  | 2.35283600  | -0.14009300 | -0.00002600 |
| C  | 3.71155500  | -0.50100300 | -0.00006500 |
| H  | 4.48592400  | 0.26079700  | -0.00012500 |
| C  | 4.08895100  | -1.84104000 | -0.00003900 |
| H  | 5.14158100  | -2.11014900 | -0.00007100 |
| C  | 3.10126100  | -2.82990300 | 0.00002900  |
| H  | 3.38473200  | -3.88011100 | 0.00005900  |
| C  | 1.74901300  | -2.47685400 | 0.00005500  |
| H  | 1.00708900  | -3.26868400 | 0.00009800  |
| C  | 1.91822900  | 1.26723000  | -0.00001900 |
| C  | 0.06908600  | 2.70204500  | -0.00000200 |
| H  | -1.01255500 | 2.78164500  | -0.00001200 |

|   |             |             |             |
|---|-------------|-------------|-------------|
| C | 0.87197700  | 3.83699000  | 0.00002500  |
| H | 0.41907300  | 4.82236900  | 0.00004700  |
| C | 2.25688400  | 3.66405300  | 0.00002900  |
| H | 2.92295400  | 4.52169700  | 0.00004900  |
| C | 2.77874900  | 2.37517900  | 0.00000700  |
| H | 3.85214300  | 2.22877800  | 0.00001500  |
| C | -1.39693600 | -2.31581900 | 0.00004700  |
| H | -1.07814500 | -2.88229600 | -0.88576200 |
| H | -1.07823300 | -2.88220400 | 0.88594800  |
| H | -2.49426500 | -2.30097000 | -0.00000800 |

**1b**

|    |             |             |             |
|----|-------------|-------------|-------------|
| Pt | 0.13899900  | -0.30768100 | -0.00115500 |
| S  | -0.46975300 | -2.74681600 | -0.00617300 |
| N  | 2.30165000  | -0.67035400 | -0.00158100 |
| C  | -1.60702400 | -3.03996100 | -1.40547500 |
| H  | -1.99390200 | -4.06041100 | -1.34641600 |
| H  | -1.02378700 | -2.92174100 | -2.32126700 |
| H  | -2.42020700 | -2.31207300 | -1.39109000 |
| C  | -1.59329400 | -3.05093900 | 1.40175900  |
| H  | -2.40827300 | -2.32496900 | 1.39856100  |
| H  | -1.00209000 | -2.93632800 | 2.31289100  |
| H  | -1.97813400 | -4.07201600 | 1.34029800  |
| C  | 0.82352200  | 1.58782600  | 0.00138700  |
| C  | 2.24147400  | 1.72083400  | 0.00244500  |
| C  | 2.84454900  | 2.99041900  | 0.00418500  |
| H  | 3.92632400  | 3.08787600  | 0.00487000  |
| C  | 2.06598900  | 4.14471300  | 0.00484900  |
| H  | 2.54155400  | 5.12156900  | 0.00618100  |
| C  | 0.67310300  | 4.03110200  | 0.00362500  |
| H  | 0.05572400  | 4.92667500  | 0.00395200  |
| C  | 0.06657400  | 2.77167600  | 0.00193300  |
| H  | -1.01620600 | 2.71059600  | 0.00054000  |
| C  | 3.03298300  | 0.47902200  | 0.00130100  |
| C  | 2.92611300  | -1.85978300 | -0.00299200 |
| H  | 2.28526500  | -2.73460700 | -0.00545300 |
| C  | 4.31081700  | -1.98373800 | -0.00153000 |
| H  | 4.76761700  | -2.96724300 | -0.00276800 |
| C  | 5.07665200  | -0.81697000 | 0.00152600  |
| H  | 6.16145100  | -0.86586000 | 0.00282300  |
| C  | 4.43420400  | 0.41633100  | 0.00291900  |
| H  | 5.01888000  | 1.32840500  | 0.00535600  |
| C  | -1.81458900 | 0.22180800  | 0.00133000  |
| C  | -2.54015700 | 0.40089000  | 1.19687900  |
| C  | -2.53259800 | 0.43811400  | -1.19376500 |
| C  | -3.89203900 | 0.76377400  | 1.19860700  |
| H  | -2.04057600 | 0.26548500  | 2.15448900  |
| C  | -3.88338200 | 0.80105500  | -1.19368500 |

|   |             |            |             |
|---|-------------|------------|-------------|
| H | -2.02572900 | 0.33251700 | -2.15126200 |
| C | -4.59337600 | 0.96866500 | 0.00342400  |
| H | -4.40831600 | 0.89494100 | 2.14878000  |
| H | -4.39282500 | 0.96222700 | -2.14306000 |
| C | -6.06075400 | 1.33516800 | 0.00168800  |
| H | -6.30115500 | 2.02903000 | -0.81216100 |
| H | -6.69879600 | 0.45063900 | -0.13332700 |
| H | -6.35684100 | 1.80591100 | 0.94557600  |

## **2a**

|    |             |             |             |
|----|-------------|-------------|-------------|
| Pt | 0.12275400  | -0.39427600 | -0.43535400 |
| N  | 1.21775800  | 1.46257000  | -0.02729700 |
| C  | 1.93255900  | -1.13821500 | 0.03489100  |
| C  | 2.92127900  | -0.16807000 | 0.37427900  |
| C  | 4.22474600  | -0.55910000 | 0.72732700  |
| H  | 4.97346200  | 0.18457500  | 0.98578500  |
| C  | 4.57959700  | -1.90510200 | 0.75135200  |
| H  | 5.58955600  | -2.19743100 | 1.02547200  |
| C  | 3.62405700  | -2.86984900 | 0.41831600  |
| H  | 3.89061300  | -3.92456100 | 0.43187800  |
| C  | 2.32674400  | -2.48700500 | 0.06760000  |
| H  | 1.60816500  | -3.26029100 | -0.18589100 |
| C  | 2.51271900  | 1.24675600  | 0.33633700  |
| C  | 0.74315300  | 2.71713700  | -0.09681400 |
| H  | -0.29679500 | 2.81111500  | -0.39142200 |
| C  | 1.52045100  | 3.83387800  | 0.18925500  |
| H  | 1.09137900  | 4.82740800  | 0.11747500  |
| C  | 2.84935500  | 3.63271400  | 0.56658800  |
| H  | 3.49293600  | 4.47545700  | 0.80116200  |
| C  | 3.34452200  | 2.33529900  | 0.63977600  |
| H  | 4.37438100  | 2.16731800  | 0.93146700  |
| C  | -0.70989500 | -2.25335800 | -0.77353600 |
| H  | -1.77737400 | -2.19403800 | -1.02006500 |
| H  | -0.20264400 | -2.75598100 | -1.60949900 |
| H  | -0.60426600 | -2.89857900 | 0.10980700  |
| S  | -2.01084200 | 0.75139000  | -1.11116700 |
| C  | -3.28262500 | 0.26100300  | -0.06226200 |
| C  | -3.14878900 | -0.50913000 | 1.12000300  |
| C  | -5.66510700 | 0.35416500  | 0.36364100  |
| H  | -4.67952700 | 1.19966700  | -1.22018500 |
| C  | -4.25379000 | -0.82617900 | 1.88435500  |
| H  | -2.15272900 | -0.83373000 | 1.39539600  |
| C  | -5.54417800 | -0.39022100 | 1.50913300  |
| H  | -6.60333100 | 0.73907100  | -0.01589300 |
| H  | -4.12755300 | -1.41593800 | 2.78726800  |
| H  | -6.42062500 | -0.62839800 | 2.09853900  |
| N  | -4.56143600 | 0.64989500  | -0.37362600 |

**2b**

|    |             |             |             |
|----|-------------|-------------|-------------|
| Pt | 0.38309100  | 0.04698600  | -0.31775200 |
| N  | 2.11947300  | -1.28777300 | -0.28621800 |
| C  | 1.81403700  | 1.32494500  | 0.30340000  |
| C  | 3.11878800  | 0.76397100  | 0.42453500  |
| C  | 4.20800000  | 1.55245400  | 0.83390300  |
| H  | 5.20024700  | 1.11928700  | 0.92271900  |
| C  | 4.03442800  | 2.90145200  | 1.13131600  |
| H  | 4.88261000  | 3.50323600  | 1.44601800  |
| C  | 2.76127400  | 3.46752600  | 1.01989700  |
| H  | 2.61409700  | 4.52064000  | 1.24979700  |
| C  | 1.67426300  | 2.68911800  | 0.61209600  |
| H  | 0.69620500  | 3.15210200  | 0.53690300  |
| C  | 3.26658300  | -0.66558100 | 0.10368500  |
| C  | 2.13832700  | -2.59377000 | -0.59859400 |
| H  | 1.18582800  | -3.01758600 | -0.89835100 |
| C  | 3.29528400  | -3.36316700 | -0.54566900 |
| H  | 3.26083900  | -4.41490300 | -0.80813100 |
| C  | 4.48144300  | -2.74309000 | -0.14937800 |
| H  | 5.40899100  | -3.30517100 | -0.09344000 |
| C  | 4.46507300  | -1.39109400 | 0.17610300  |
| H  | 5.37994300  | -0.90026100 | 0.48600100  |
| S  | -1.20062100 | -1.67871800 | -1.25136600 |
| C  | -2.28005500 | -2.19751800 | -0.01731700 |
| C  | -2.22010000 | -1.85466500 | 1.35650500  |
| C  | -4.23159700 | -3.54111100 | 0.48595200  |
| C  | -3.14859500 | -2.35205700 | 2.24910000  |
| H  | -1.42399000 | -1.19374000 | 1.67549700  |
| C  | -4.18010100 | -3.21480400 | 1.81704000  |
| H  | -4.97821800 | -4.19137400 | 0.04782100  |
| H  | -3.08219300 | -2.07713500 | 3.29743300  |
| H  | -4.91508700 | -3.61426400 | 2.50441900  |
| N  | -3.30682500 | -3.03592200 | -0.37325000 |
| H  | -3.37071400 | -3.29017800 | -1.35498600 |
| C  | -1.11292200 | 1.41071300  | -0.29722500 |
| C  | -1.67109800 | 1.90865700  | -1.49377000 |
| C  | -1.67203300 | 1.91364300  | 0.89533200  |
| C  | -2.71290600 | 2.84083000  | -1.49828600 |
| H  | -1.28442000 | 1.56177400  | -2.45016200 |
| C  | -2.72199400 | 2.83924900  | 0.89365500  |
| H  | -1.27487600 | 1.58835000  | 1.85501000  |
| C  | -3.26573900 | 3.32249700  | -0.30314700 |
| H  | -3.10353000 | 3.20085400  | -2.44964100 |
| H  | -3.12045900 | 3.19652000  | 1.84270900  |
| C  | -4.41651600 | 4.30416500  | -0.30830200 |
| H  | -5.38393400 | 3.79520500  | -0.42315300 |
| H  | -4.46137600 | 4.87384700  | 0.62660400  |
| H  | -4.33275100 | 5.01902100  | -1.13526100 |

**2a'**

|    |             |             |             |
|----|-------------|-------------|-------------|
| Pt | -0.07151500 | -0.37702800 | -0.56363200 |
| N  | -1.13447900 | 1.46857800  | -0.05174100 |
| C  | -1.83813400 | -1.13529900 | 0.04871300  |
| C  | -2.80087700 | -0.16898000 | 0.46311300  |
| C  | -4.07060400 | -0.56527900 | 0.91775200  |
| H  | -4.80002000 | 0.17494600  | 1.23443400  |
| C  | -4.41546300 | -1.91321800 | 0.97138600  |
| H  | -5.39914800 | -2.20983800 | 1.32482800  |
| C  | -3.48468600 | -2.87417900 | 0.56634300  |
| H  | -3.74419700 | -3.93002200 | 0.60260900  |
| C  | -2.22060900 | -2.48545700 | 0.11395500  |
| H  | -1.52077300 | -3.25570300 | -0.19506600 |
| C  | -2.40204000 | 1.24799000  | 0.39492900  |
| C  | -0.66834700 | 2.72404000  | -0.15270800 |
| H  | 0.35072100  | 2.81864000  | -0.51268300 |
| C  | -1.42995700 | 3.83820700  | 0.18184900  |
| H  | -1.01001800 | 4.83322100  | 0.08256000  |
| C  | -2.73183300 | 3.63272800  | 0.64172400  |
| H  | -3.36261400 | 4.47365800  | 0.91433400  |
| C  | -3.21720200 | 2.33369200  | 0.74808200  |
| H  | -4.22667200 | 2.16288400  | 1.10262000  |
| C  | 0.72067900  | -2.23109100 | -1.02431300 |
| H  | 1.75734800  | -2.17048100 | -1.37856300 |
| H  | 0.69749400  | -2.90762200 | -0.15877800 |
| H  | 0.12486400  | -2.69932400 | -1.82052300 |
| S  | 2.05673200  | 0.75937400  | -1.28975100 |
| C  | 3.21222400  | 0.31070200  | -0.09491000 |
| C  | 4.57738500  | 0.68763300  | -0.12962800 |
| C  | 3.65694900  | -0.86038600 | 1.96864400  |
| C  | 5.44010100  | 0.29096700  | 0.87266000  |
| H  | 4.92283700  | 1.29129300  | -0.96049400 |
| C  | 4.98140300  | -0.50026400 | 1.94933000  |
| H  | 3.20322500  | -1.46406000 | 2.74490000  |
| H  | 6.48315500  | 0.58949300  | 0.83090600  |
| H  | 5.64479400  | -0.82043200 | 2.74295700  |
| N  | 2.82872800  | -0.45352900 | 0.97273000  |
| H  | 1.83575300  | -0.72460900 | 0.97680400  |

**2b'**

|    |            |             |             |
|----|------------|-------------|-------------|
| Pt | 0.35626400 | 0.04726600  | -0.37411400 |
| N  | 2.23654900 | -1.06893100 | -0.34632300 |
| C  | 1.61290200 | 1.46680800  | 0.32979000  |
| C  | 2.96693200 | 1.04981400  | 0.48553700  |
| C  | 3.94514800 | 1.93906300  | 0.96286600  |
| H  | 4.97525400 | 1.61528900  | 1.08165400  |
| C  | 3.61163300 | 3.25100800  | 1.28928400  |
| H  | 4.37484900 | 3.93125000  | 1.65712100  |

|   |             |             |             |
|---|-------------|-------------|-------------|
| C | 2.29061500  | 3.67895900  | 1.13436200  |
| H | 2.01965600  | 4.70313100  | 1.38150300  |
| C | 1.31275600  | 2.79853800  | 0.66169400  |
| H | 0.29506300  | 3.15732000  | 0.55439400  |
| C | 3.28934800  | -0.33866700 | 0.11522400  |
| C | 2.41926700  | -2.34533900 | -0.72271300 |
| H | 1.53382800  | -2.86129600 | -1.07805900 |
| C | 3.65675500  | -2.97630000 | -0.66307000 |
| H | 3.75548700  | -4.00885400 | -0.97961300 |
| C | 4.74720300  | -2.24571500 | -0.18848300 |
| H | 5.73179100  | -2.69912200 | -0.12275800 |
| C | 4.56118900  | -0.92376000 | 0.20138000  |
| H | 5.40088200  | -0.34714200 | 0.57026900  |
| S | -1.00392500 | -1.85676600 | -1.32008300 |
| C | -1.99396600 | -2.40698400 | -0.02478600 |
| C | -2.94992400 | -3.44543000 | -0.14665100 |
| C | -2.61840600 | -2.19542600 | 2.29770300  |
| C | -3.70679800 | -3.83281200 | 0.94100600  |
| H | -3.07042300 | -3.92224200 | -1.11217700 |
| C | -3.54640400 | -3.20142100 | 2.19448700  |
| H | -2.41725100 | -1.64483400 | 3.20827300  |
| H | -4.43491400 | -4.63048200 | 0.82989300  |
| H | -4.13317700 | -3.49209400 | 3.05681100  |
| N | -1.88384000 | -1.83704700 | 1.21309700  |
| H | -1.19648500 | -1.07814900 | 1.28263300  |
| C | -1.29609800 | 1.22258300  | -0.36020500 |
| C | -1.95435100 | 1.55685200  | -1.56330700 |
| C | -1.86953800 | 1.74563400  | 0.81684600  |
| C | -3.09621000 | 2.36176200  | -1.58834700 |
| H | -1.56585500 | 1.18171200  | -2.50780700 |
| C | -3.02293600 | 2.53885300  | 0.79585400  |
| H | -1.40020600 | 1.54903800  | 1.77920400  |
| C | -3.66069300 | 2.86474300  | -0.40696800 |
| H | -3.55945500 | 2.60141500  | -2.54488300 |
| H | -3.42806500 | 2.91655700  | 1.73390100  |
| C | -4.91731600 | 3.70596500  | -0.43331600 |
| H | -5.81840100 | 3.08505000  | -0.53435300 |
| H | -5.02743600 | 4.28919700  | 0.48746400  |
| H | -4.91652100 | 4.40521100  | -1.27780300 |

I

|    |            |             |             |
|----|------------|-------------|-------------|
| Pt | 0.03489300 | -0.03415400 | -0.58004100 |
| N  | 2.23765300 | 0.10892500  | -0.72560200 |
| C  | 0.59429000 | -1.77136300 | 0.34036500  |
| C  | 1.99504700 | -1.96679500 | 0.43580200  |
| C  | 2.49808300 | -3.10350300 | 1.09299200  |
| H  | 3.56914700 | -3.25858700 | 1.17996200  |
| C  | 1.63345000 | -4.04439300 | 1.64497400  |

|   |             |             |             |
|---|-------------|-------------|-------------|
| H | 2.03468500  | -4.91852700 | 2.14956500  |
| C | 0.25307700  | -3.85631900 | 1.54270300  |
| H | -0.42904800 | -4.58820900 | 1.96802700  |
| C | -0.25998800 | -2.72939700 | 0.89235500  |
| H | -1.33400500 | -2.59899700 | 0.82365600  |
| C | 2.87630400  | -0.94946500 | -0.16332100 |
| C | 2.93266600  | 1.09917200  | -1.30499700 |
| H | 2.34040400  | 1.90592200  | -1.72380700 |
| C | 4.32173600  | 1.09420900  | -1.35973300 |
| H | 4.84912600  | 1.91230200  | -1.83748300 |
| C | 5.00127400  | 0.01643900  | -0.78879400 |
| H | 6.08595300  | -0.02716900 | -0.81139800 |
| C | 4.27722100  | -1.00810100 | -0.18855100 |
| H | 4.79591400  | -1.84936200 | 0.25482200  |
| C | -1.97977300 | -0.34169200 | -0.43818200 |
| C | -2.75996400 | -0.67735000 | -1.55843700 |
| C | -2.64334700 | -0.21216300 | 0.78999300  |
| C | -4.13900700 | -0.86943700 | -1.45095100 |
| H | -2.29323800 | -0.78893100 | -2.53290700 |
| C | -4.02596000 | -0.40671700 | 0.89383700  |
| H | -2.08602800 | 0.03750500  | 1.68769200  |
| C | -4.80206100 | -0.73644700 | -0.22246000 |
| H | -4.70857600 | -1.13055600 | -2.34141300 |
| H | -4.50502500 | -0.29807200 | 1.86528000  |
| C | -6.29800500 | -0.92998200 | -0.11707000 |
| H | -6.62131400 | -0.97855800 | 0.92793200  |
| H | -6.84445100 | -0.10482100 | -0.59293300 |
| H | -6.62043100 | -1.85320900 | -0.61341600 |
| S | -0.40679900 | 2.37364600  | -1.35672900 |
| C | -0.16055900 | 2.65118800  | 0.36147800  |
| C | -0.18671800 | 3.88779900  | 1.02875500  |
| C | 0.04539400  | 3.91393900  | 2.39834100  |
| H | -0.38354100 | 4.79719500  | 0.47112900  |
| C | 0.31052000  | 1.53341200  | 2.37155200  |
| C | 0.30204900  | 2.72119500  | 3.09062900  |
| H | 0.02955400  | 4.86050800  | 2.93128600  |
| H | 0.50036300  | 0.57367800  | 2.84282000  |
| H | 0.48889900  | 2.71466700  | 4.15856300  |
| N | 0.07977700  | 1.50670300  | 1.04923600  |
| H | -0.01768000 | -0.91589800 | -1.86963600 |

I'

|    |            |             |             |
|----|------------|-------------|-------------|
| Pt | 0.03489300 | -0.03415400 | -0.58004100 |
| N  | 2.23765300 | 0.10892500  | -0.72560200 |
| C  | 0.59429000 | -1.77136300 | 0.34036500  |
| C  | 1.99504700 | -1.96679500 | 0.43580200  |
| C  | 2.49808300 | -3.10350300 | 1.09299200  |
| H  | 3.56914700 | -3.25858700 | 1.17996200  |

|   |             |             |             |
|---|-------------|-------------|-------------|
| C | 1.63345000  | -4.04439300 | 1.64497400  |
| H | 2.03468500  | -4.91852700 | 2.14956500  |
| C | 0.25307700  | -3.85631900 | 1.54270300  |
| H | -0.42904800 | -4.58820900 | 1.96802700  |
| C | -0.25998800 | -2.72939700 | 0.89235500  |
| H | -1.33400500 | -2.59899700 | 0.82365600  |
| C | 2.87630400  | -0.94946500 | -0.16332100 |
| C | 2.93266600  | 1.09917200  | -1.30499700 |
| H | 2.34040400  | 1.90592200  | -1.72380700 |
| C | 4.32173600  | 1.09420900  | -1.35973300 |
| H | 4.84912600  | 1.91230200  | -1.83748300 |
| C | 5.00127400  | 0.01643900  | -0.78879400 |
| H | 6.08595300  | -0.02716900 | -0.81139800 |
| C | 4.27722100  | -1.00810100 | -0.18855100 |
| H | 4.79591400  | -1.84936200 | 0.25482200  |
| C | -1.97977300 | -0.34169200 | -0.43818200 |
| C | -2.75996400 | -0.67735000 | -1.55843700 |
| C | -2.64334700 | -0.21216300 | 0.78999300  |
| C | -4.13900700 | -0.86943700 | -1.45095100 |
| H | -2.29323800 | -0.78893100 | -2.53290700 |
| C | -4.02596000 | -0.40671700 | 0.89383700  |
| H | -2.08602800 | 0.03750500  | 1.68769200  |
| C | -4.80206100 | -0.73644700 | -0.22246000 |
| H | -4.70857600 | -1.13055600 | -2.34141300 |
| H | -4.50502500 | -0.29807200 | 1.86528000  |
| C | -6.29800500 | -0.92998200 | -0.11707000 |
| H | -6.62131400 | -0.97855800 | 0.92793200  |
| H | -6.84445100 | -0.10482100 | -0.59293300 |
| H | -6.62043100 | -1.85320900 | -0.61341600 |
| S | -0.40679900 | 2.37364600  | -1.35672900 |
| C | -0.16055900 | 2.65118800  | 0.36147800  |
| C | -0.18671800 | 3.88779900  | 1.02875500  |
| C | 0.04539400  | 3.91393900  | 2.39834100  |
| H | -0.38354100 | 4.79719500  | 0.47112900  |
| C | 0.31052000  | 1.53341200  | 2.37155200  |
| C | 0.30204900  | 2.72119500  | 3.09062900  |
| H | 0.02955400  | 4.86050800  | 2.93128600  |
| H | 0.50036300  | 0.57367800  | 2.84282000  |
| H | 0.48889900  | 2.71466700  | 4.15856300  |
| N | 0.07977700  | 1.50670300  | 1.04923600  |
| H | -0.01768000 | -0.91589800 | -1.86963600 |

### 3

|    |            |             |             |
|----|------------|-------------|-------------|
| Pt | 0.24496000 | -1.22393400 | 0.94679800  |
| Pt | 0.24611300 | 1.22370900  | -0.94685100 |
| S  | 1.38471400 | 0.31025600  | 2.34858400  |
| S  | 1.38394100 | -0.31189300 | -2.34850200 |



|   |             |             |             |
|---|-------------|-------------|-------------|
| N | 2.17268000  | -1.64885500 | -0.09749200 |
| C | -1.51761100 | 1.05026800  | -1.89314500 |
| N | -0.82070300 | 2.74410300  | 0.01926300  |
| C | -1.51832800 | -1.04918800 | 1.89356300  |
| C | -2.90440800 | 3.91345400  | 0.14976600  |
| H | -3.92336300 | 4.04633500  | -0.19386800 |
| C | 4.56178300  | 2.52455200  | 1.24411900  |
| H | 5.48798900  | 2.86302900  | 1.69945900  |
| C | 4.23974300  | -2.87911200 | 0.07336600  |
| H | 4.89629000  | -3.49508600 | 0.67761100  |
| N | 2.17413700  | 1.64680700  | 0.09751900  |
| C | 3.04549400  | -2.41436400 | 0.59817900  |
| H | 2.74197800  | -2.65540000 | 1.61107800  |
| C | -2.10744200 | -2.90918500 | 0.41537600  |
| C | -2.51138900 | -1.97777500 | 1.47121100  |
| N | -0.82356700 | -2.74288500 | -0.01962600 |
| C | -2.10447700 | 2.91152700  | -0.41558700 |
| C | -2.50962000 | 1.98001600  | -1.47087300 |
| C | 2.48425700  | 1.27833400  | 1.36538000  |
| C | -1.88087500 | -0.13329800 | 2.89511100  |
| H | -1.15769500 | 0.60037600  | 3.23696800  |
| C | -0.32594600 | 3.53946200  | 0.98564300  |
| H | 0.69743100  | 3.34885900  | 1.27984800  |
| C | 4.55924400  | -2.52897100 | -1.24449400 |
| H | 5.48503500  | -2.86838800 | -1.69997600 |
| C | 3.68514500  | -1.72495800 | -1.95822500 |
| H | 3.91445400  | -1.41582500 | -2.97205500 |
| C | 3.04748800  | 2.41167900  | -0.59820100 |
| H | 2.74397200  | 2.65319400  | -1.61099800 |
| C | -3.15947500 | -0.13829800 | 3.46092400  |
| H | -3.40629500 | 0.58343700  | 4.23622900  |
| C | 3.68711100  | 1.72120000  | 1.95789900  |
| H | 3.91638000  | 1.41166800  | 2.97161300  |
| C | 2.48284100  | -1.28087200 | -1.36549600 |
| C | -3.79546700 | -1.97706000 | 2.04100300  |
| H | -4.54612600 | -2.68963200 | 1.71103200  |
| C | -0.32976000 | -3.53842900 | -0.98633800 |
| H | 0.69376400  | -3.34882300 | -1.28058300 |
| C | -1.88137200 | 0.13433000  | -2.89419700 |
| H | -1.15902300 | -0.60017000 | -3.23604200 |
| C | -4.12166500 | -1.06034000 | 3.03649500  |
| H | -5.11544500 | -1.06304700 | 3.47511900  |
| C | -1.07664500 | 4.54720400  | 1.57603900  |
| H | -0.63487300 | 5.16395000  | 2.35049700  |
| C | -2.39770600 | -4.73187200 | -1.14808600 |
| H | -3.01753600 | -5.50856100 | -1.58519800 |
| C | 4.24228400  | 2.87525800  | -0.07358400 |
| H | 4.89920600  | 3.49080500  | -0.67785500 |

|   |             |             |             |
|---|-------------|-------------|-------------|
| C | -2.90851000 | -3.91002600 | -0.15027300 |
| H | -3.92753700 | -4.04198100 | 0.19352000  |
| C | -4.12133300 | 1.06342800  | -3.03518200 |
| H | -5.11526900 | 1.06688300  | -3.47344300 |
| C | -3.79391800 | 1.98024700  | -2.04018600 |
| H | -4.54382100 | 2.69360700  | -1.71020600 |
| C | -2.39257900 | 4.73517200  | 1.14716000  |
| H | -3.01153600 | 5.51268100  | 1.58405900  |
| C | -3.16016200 | 0.14031000  | -3.45957300 |
| H | -3.40792000 | -0.58150100 | -4.23450800 |
| C | -1.08161900 | -4.54515600 | -1.57702000 |
| H | -0.64057400 | -5.16206700 | -2.35176500 |
